# Supplementary material for: Exploring the Antioxidant Properties of Caffeoylquinic and Feruloylquinic Acids: A Computational Study on Hydroperoxyl Radical Scavenging and Xanthine Oxidase Inhibition
Source: MDPI journal article supplement (doi:10.3390/antiox12091669), 2023-08-25
Supplement: s1 [file s1]

## SUPPORTING INFORMATION

---

# Exploring the Antioxidant Properties of Caffeoylquinic and Feruloylquinic Acids: A Computational Study on Hydroperoxyl Radical Scavenging and Xanthine Oxidase Inhibition

Housseem Boulebd<sup>1,\*</sup>, Miguel Carmena-Bargueño<sup>2</sup>, Horacio Pérez-Sánchez<sup>2</sup>

<sup>1</sup> Department of Chemistry, Faculty of Exact Science, University of Constantine 1, Constantine 25000, Algeria

<sup>2</sup> Structural Bioinformatics and High-Performance Computing Research Group (BIO-HPC), Computer Engineering Department, Universidad Católica de Murcia (UCAM), Campus de los Jerónimos 135, 30107 Guadalupe, Spain; mcarmena@ucam.edu (M.C.-B.); hperez@ucam.edu (H.P.-S.)

\* Correspondence: boulebd.housseem@umc.edu.dz

**Table S1.** The cartesian coordinates and energies of the TSs of the reaction between 5-CQA and 5-FQA and HOO<sup>\*</sup> calculated at M06-2X/6-311++G(d,p) level in physiological media.

| 5CQA W RAF C8 dianion TS |             |             |             | Frequency and Energy                                     |
|--------------------------|-------------|-------------|-------------|----------------------------------------------------------|
| Cartesian Coordinates    |             |             |             |                                                          |
| C                        | -3.53034900 | -0.17879900 | -0.18519900 | Zero-point Energy Correction = 0.328347 Hartree          |
| C                        | -4.06455300 | 0.90339300  | -0.94672300 | Thermal Correction to Energy = 0.354144 Hartree          |
| C                        | -5.40184500 | 1.15778500  | -0.94734600 | Thermal Correction to Enthalpy = 0.355088 Hartree        |
| C                        | -6.33897600 | 0.35643200  | -0.18304300 | Thermal Correction to Free Energy = 0.270157 Hartree     |
| C                        | -5.78087300 | -0.72033900 | 0.58105400  |                                                          |
| C                        | -4.43724100 | -0.97349800 | 0.57862100  | EE + Zero-point Energy = -1447.177 Hartree               |
| C                        | -2.13572400 | -0.40509400 | -0.19561700 | EE + Thermal Energy Correction = -1447.1512 Hartree      |
| C                        | -1.48416800 | -1.40939300 | 0.49152200  | EE + Thermal Enthalpy Correction = -1447.1503 Hartree    |
| C                        | -0.03334000 | -1.60645800 | 0.40012900  |                                                          |
| O                        | 0.62296000  | -0.54590400 | -0.08951000 | EE + Thermal Free Energy Correction = -1447.2352 Hartree |
| O                        | 0.52796500  | -2.62703500 | 0.76372100  |                                                          |
| C                        | 2.06598100  | -0.56423300 | -0.07471400 |                                                          |
| C                        | 2.52411600  | 0.87101900  | 0.11930900  |                                                          |
| C                        | 4.05592000  | 0.94442000  | 0.16600300  |                                                          |
| C                        | 4.66178800  | 0.29434000  | -1.08577700 |                                                          |
| C                        | 4.12513600  | -1.09712500 | -1.39457700 |                                                          |
| C                        | 2.59351800  | -1.11534700 | -1.39144800 |                                                          |
| O                        | 2.11165000  | -2.42579500 | -1.66519700 |                                                          |
| O                        | 4.52151900  | 0.28857100  | 1.34178300  |                                                          |
| O                        | -7.57022400 | 0.64163800  | -0.22535300 |                                                          |
| O                        | -5.93267400 | 2.18651000  | -1.67117800 |                                                          |
| O                        | 4.63652300  | -2.03409500 | -0.44795800 |                                                          |
| C                        | 4.48481300  | 2.43606600  | 0.22931100  |                                                          |
| O                        | 4.18037800  | 3.17050300  | -0.73581900 |                                                          |
| O                        | 5.10611200  | 2.78456400  | 1.26559700  |                                                          |
| H                        | -3.39689300 | 1.52694500  | -1.53270400 |                                                          |
| H                        | -6.46313400 | -1.32544200 | 1.16783400  |                                                          |
| H                        | -4.05382600 | -1.79157500 | 1.17737200  |                                                          |
| H                        | -1.53256400 | 0.31541900  | -0.73924600 |                                                          |
| H                        | 2.39451700  | -1.19120500 | 0.75652100  |                                                          |
| H                        | 2.15583600  | 1.47816700  | -0.71201800 |                                                          |
| H                        | 2.11190400  | 1.26617100  | 1.05124800  |                                                          |
| H                        | 4.42715000  | 0.93005900  | -1.94291000 |                                                          |
| H                        | 5.74974300  | 0.25411100  | -0.98604000 |                                                          |
| H                        | 4.45710500  | -1.38972200 | -2.39662700 |                                                          |
| H                        | 2.23995800  | -0.47452400 | -2.20578000 |                                                          |
| H                        | 1.96895100  | -2.88894600 | -0.82843900 |                                                          |
| H                        | 4.93150400  | 0.99838200  | 1.86491300  |                                                          |
| H                        | 4.33136000  | -2.91112300 | -0.71057700 |                                                          |
| H                        | -2.01201600 | -2.26615600 | 0.88735800  |                                                          |
| O                        | -1.16658400 | -0.69107900 | 2.44983500  |                                                          |

|                          |             |             |             |                                                          |
|--------------------------|-------------|-------------|-------------|----------------------------------------------------------|
| H                        | -6.89123200 | 2.16417600  | -1.51373600 |                                                          |
| O                        | -1.50842700 | 0.66190000  | 2.42370200  |                                                          |
| H                        | -2.47714200 | 0.66801900  | 2.41681900  |                                                          |
| 5FQA W RAF C8 dianion TS |             |             |             |                                                          |
| Cartesian Coordinates    |             |             |             | Frequency and Energy                                     |
| C                        | -3.32728300 | -0.42771900 | -0.07400000 | Zero-point Energy Correction = 0.357509 Hartree          |
| C                        | -3.92784000 | 0.77989100  | -0.54644000 | Thermal Correction to Energy = 0.38454 Hartree           |
| C                        | -5.27629400 | 0.98138200  | -0.46121200 | Thermal Correction to Enthalpy = 0.385485 Hartree        |
| C                        | -6.15810200 | -0.02271800 | 0.12484700  | Thermal Correction to Free Energy = 0.29705 Hartree      |
| C                        | -5.52372600 | -1.22476100 | 0.59422200  | EE + Zero-point Energy = -1486.4316 Hartree              |
| C                        | -4.17580500 | -1.41928100 | 0.50023500  | EE + Thermal Energy Correction = -1486.4046 Hartree      |
| C                        | -1.92507000 | -0.57525000 | -0.16186700 | EE + Thermal Enthalpy Correction = -1486.4036 Hartree    |
| C                        | -1.21681400 | -1.68736100 | 0.24526500  | EE + Thermal Free Energy Correction = -1486.4921 Hartree |
| C                        | 0.24177200  | -1.78613600 | 0.09833000  |                                                          |
| O                        | 0.83654700  | -0.59875600 | -0.08446000 |                                                          |
| O                        | 0.84886000  | -2.83906700 | 0.17280000  |                                                          |
| C                        | 2.26872200  | -0.54881300 | -0.22408200 |                                                          |
| C                        | 2.76035800  | 0.67535800  | 0.53223100  |                                                          |
| C                        | 4.27659200  | 0.81536900  | 0.37236000  |                                                          |
| C                        | 4.64866300  | 0.90007700  | -1.11479400 |                                                          |
| C                        | 4.12171300  | -0.29471000 | -1.90355300 |                                                          |
| C                        | 2.61095700  | -0.45608800 | -1.70670300 |                                                          |
| O                        | 2.12618800  | -1.58241700 | -2.42013400 |                                                          |
| O                        | 4.90152700  | -0.33496900 | 0.94953900  |                                                          |
| O                        | -7.39936600 | 0.17015700  | 0.21343600  |                                                          |
| O                        | -5.92893500 | 2.09520600  | -0.88850400 |                                                          |
| O                        | 4.78768500  | -1.51271600 | -1.55951700 |                                                          |
| C                        | 4.78326800  | 2.08096200  | 1.10368700  |                                                          |
| O                        | 4.29639500  | 3.17958100  | 0.75745100  |                                                          |
| O                        | 5.66187000  | 1.89390900  | 1.98273100  |                                                          |
| H                        | -3.27764400 | 1.53273900  | -0.97582300 |                                                          |
| H                        | -6.16792600 | -1.97573900 | 1.03841800  |                                                          |
| H                        | -3.74467400 | -2.33802900 | 0.88198800  |                                                          |
| H                        | -1.36631000 | 0.28594300  | -0.51476900 |                                                          |
| H                        | 2.69275800  | -1.46033500 | 0.20057500  |                                                          |
| H                        | 2.27266800  | 1.56849200  | 0.13334900  |                                                          |
| H                        | 2.50728300  | 0.58145200  | 1.59134300  |                                                          |
| H                        | 4.21629700  | 1.81194200  | -1.53356000 |                                                          |
| H                        | 5.73582500  | 0.95869900  | -1.21818800 |                                                          |
| H                        | 4.30478500  | -0.14384600 | -2.96963300 |                                                          |
| H                        | 2.10579900  | 0.41875600  | -2.12692600 |                                                          |
| H                        | 2.65384000  | -2.34367000 | -2.14238400 |                                                          |
| H                        | 5.55450700  | 0.02240300  | 1.57562300  |                                                          |
| H                        | 4.98209700  | -1.48201800 | -0.61028400 |                                                          |
| H                        | -1.70005300 | -2.64149100 | 0.40434600  |                                                          |
| O                        | -0.92880700 | -1.50206500 | 2.33042000  |                                                          |
| O                        | -1.42280800 | -0.23751800 | 2.67293000  |                                                          |
| H                        | -2.38571000 | -0.33914700 | 2.64912800  |                                                          |
| C                        | -5.13949900 | 3.12696300  | -1.46903700 |                                                          |

|                       |             |             |             |                                                          |
|-----------------------|-------------|-------------|-------------|----------------------------------------------------------|
| H                     | -4.41222700 | 3.51011300  | -0.74850700 |                                                          |
| H                     | -4.62063700 | 2.76254700  | -2.35953300 |                                                          |
| H                     | -5.83362000 | 3.91744800  | -1.74561000 |                                                          |
| TS 5CQA 12OH PE FHT   |             |             |             |                                                          |
| Cartesian Coordinates |             |             |             | Frequency and Energy                                     |
| C                     | -3.42920400 | -1.99580800 | -0.31791900 | Zero-point Energy Correction = 0.351946 Hartree          |
| C                     | -2.46422800 | -0.97638000 | -0.14450600 | Thermal Correction to Energy = 0.37776 Hartree           |
| C                     | -2.85176900 | 0.21481700  | 0.45611500  | Thermal Correction to Enthalpy = 0.378705 Hartree        |
| C                     | -4.17198300 | 0.39375000  | 0.89074100  | Thermal Correction to Free Energy = 0.292615 Hartree     |
| C                     | -5.11923300 | -0.65740100 | 0.71749800  |                                                          |
| C                     | -4.73498500 | -1.84980000 | 0.10911900  | EE + Zero-point Energy = -1448.0433 Hartree              |
| O                     | -4.59504600 | 1.50634500  | 1.46585000  | EE + Thermal Energy Correction = -1448.0175 Hartree      |
| O                     | -6.36977500 | -0.48552200 | 1.13970200  | EE + Thermal Enthalpy Correction = -1448.0166 Hartree    |
| C                     | -1.09995400 | -1.22616900 | -0.60969900 |                                                          |
| C                     | -0.02385500 | -0.46622000 | -0.37102900 | EE + Thermal Free Energy Correction = -1448.1027 Hartree |
| C                     | 1.27994000  | -0.86500700 | -0.92564600 |                                                          |
| O                     | 1.48505700  | -1.85987500 | -1.59153000 |                                                          |
| H                     | -3.12791300 | -2.92110600 | -0.79717600 |                                                          |
| H                     | -2.15895700 | 1.03671600  | 0.60059800  |                                                          |
| H                     | -5.46648600 | -2.63713700 | -0.02499500 |                                                          |
| H                     | -4.78658900 | 2.25632000  | 0.66806400  |                                                          |
| H                     | -6.43487200 | 0.39448200  | 1.54470300  |                                                          |
| H                     | -0.95715400 | -2.12989400 | -1.19817800 |                                                          |
| H                     | -0.04678100 | 0.43859600  | 0.22377700  |                                                          |
| O                     | -5.00523000 | 2.79385800  | -0.46967500 |                                                          |
| O                     | -5.11097200 | 1.71729600  | -1.28781400 |                                                          |
| H                     | -4.22264900 | 1.59298300  | -1.66623700 |                                                          |
| O                     | 2.23537100  | 0.01737000  | -0.61366400 |                                                          |
| C                     | 3.61700900  | -0.30044300 | -0.91202900 |                                                          |
| C                     | 4.42585500  | 0.49951600  | 0.09961400  |                                                          |
| C                     | 3.96556600  | 0.09224600  | -2.34673400 |                                                          |
| H                     | 3.76089400  | -1.37495900 | -0.76783200 |                                                          |
| C                     | 5.93476800  | 0.31027200  | -0.13062500 |                                                          |
| H                     | 4.16483200  | 1.55634900  | 0.00551600  |                                                          |
| H                     | 4.16522900  | 0.16796900  | 1.10741000  |                                                          |
| C                     | 5.47591100  | 0.00365500  | -2.59648000 |                                                          |
| O                     | 3.36380100  | -0.74792400 | -3.31928200 |                                                          |
| H                     | 3.64678400  | 1.13140300  | -2.50118100 |                                                          |
| C                     | 6.29380100  | 0.75673400  | -1.55928000 |                                                          |
| O                     | 6.31229600  | -1.02301100 | 0.11646900  |                                                          |
| C                     | 6.70708300  | 1.17446300  | 0.86582700  |                                                          |
| O                     | 5.88149200  | -1.36448200 | -2.57317500 |                                                          |
| H                     | 5.67188900  | 0.42108800  | -3.58994000 |                                                          |
| H                     | 2.67061400  | -1.27971000 | -2.90241400 |                                                          |
| H                     | 6.09717700  | 1.82583900  | -1.66445900 |                                                          |
| H                     | 7.35806000  | 0.58585900  | -1.74232600 |                                                          |
| H                     | 6.25516500  | -1.50338200 | -0.72152400 |                                                          |
| O                     | 6.33897300  | 2.46642600  | 0.78526600  |                                                          |
| O                     | 7.54374400  | 0.78465400  | 1.62788700  |                                                          |

|                       |             |             |             |                                                          |
|-----------------------|-------------|-------------|-------------|----------------------------------------------------------|
| H                     | 5.25408200  | -1.85027200 | -3.12500500 |                                                          |
| H                     | 6.86437000  | 2.96748900  | 1.42738800  |                                                          |
| TS 5CQA 13OH PE FHT   |             |             |             |                                                          |
| Cartesian Coordinates |             |             |             | Frequency and Energy                                     |
| C                     | 3.10178200  | 0.18209500  | -0.40238300 | Zero-point Energy Correction = 0.352706 Hartree          |
| C                     | 4.16914400  | 0.98186000  | 0.00571400  | Thermal Correction to Energy = 0.378208 Hartree          |
| C                     | 5.47462500  | 0.60127800  | -0.27719800 | Thermal Correction to Enthalpy = 0.379153 Hartree        |
| C                     | 5.72668900  | -0.60108500 | -0.98848100 | Thermal Correction to Free Energy = 0.294597 Hartree     |
| C                     | 4.63873400  | -1.40014500 | -1.39818400 |                                                          |
| C                     | 3.35050100  | -1.01807500 | -1.10996700 | EE + Zero-point Energy = -1448.0494 Hartree              |
| C                     | 1.74942900  | 0.63715200  | -0.08221300 | EE + Thermal Energy Correction = -1448.0239 Hartree      |
| C                     | 0.60560800  | 0.02164600  | -0.40680400 | EE + Thermal Enthalpy Correction = -1448.0229 Hartree    |
| C                     | -0.67872000 | 0.63170900  | -0.01817900 |                                                          |
| O                     | -1.71344100 | -0.07855000 | -0.47695000 | EE + Thermal Free Energy Correction = -1448.1075 Hartree |
| O                     | -0.80216200 | 1.65271500  | 0.62640200  |                                                          |
| C                     | -3.05670300 | 0.26055100  | -0.05358000 |                                                          |
| C                     | -3.83986300 | -1.03622400 | -0.20984800 |                                                          |
| C                     | -5.32385100 | -0.83494600 | 0.10241200  |                                                          |
| C                     | -5.90979600 | 0.24654000  | -0.81457500 |                                                          |
| C                     | -5.14086500 | 1.54952400  | -0.68041800 |                                                          |
| C                     | -3.63463800 | 1.38471800  | -0.91429200 |                                                          |
| O                     | -3.07057100 | 2.65413600  | -0.62547900 |                                                          |
| O                     | -5.51422800 | -0.52159700 | 1.47816500  |                                                          |
| O                     | 6.98479100  | -0.90653600 | -1.25408000 |                                                          |
| O                     | 6.49983300  | 1.36482400  | 0.11224300  |                                                          |
| O                     | -5.36181100 | 2.05011700  | 0.63953600  |                                                          |
| C                     | -6.06825100 | -2.15237600 | -0.15856700 |                                                          |
| O                     | -6.80907900 | -2.59026600 | 0.85454700  |                                                          |
| O                     | -6.00072400 | -2.73975100 | -1.20318900 |                                                          |
| H                     | 3.99262200  | 1.90456500  | 0.54692500  |                                                          |
| H                     | 4.85067400  | -2.31050000 | -1.94823600 |                                                          |
| H                     | 2.52535700  | -1.63970300 | -1.43441100 |                                                          |
| H                     | 1.68119400  | 1.57225100  | 0.46877900  |                                                          |
| H                     | 0.55735500  | -0.90913000 | -0.95732500 |                                                          |
| H                     | -3.01769400 | 0.57270300  | 0.99417400  |                                                          |
| H                     | -3.74071800 | -1.39546000 | -1.23730500 |                                                          |
| H                     | -3.41995200 | -1.79092000 | 0.45906700  |                                                          |
| H                     | -5.85070100 | -0.10420100 | -1.84743100 |                                                          |
| H                     | -6.96256200 | 0.41619400  | -0.57245200 |                                                          |
| H                     | -5.51403200 | 2.27609200  | -1.40939400 |                                                          |
| H                     | -3.46978700 | 1.12636700  | -1.96850300 |                                                          |
| H                     | -2.23469800 | 2.53732200  | -0.15141100 |                                                          |
| H                     | -5.51922100 | 0.44438500  | 1.57336000  |                                                          |
| H                     | 7.31598000  | -1.67669000 | -0.54417500 |                                                          |
| H                     | -4.75243500 | 2.79042400  | 0.76334200  |                                                          |
| O                     | 7.38638600  | -2.44140500 | 0.50290500  |                                                          |
| O                     | 6.36030900  | -1.98644700 | 1.26017700  |                                                          |
| H                     | 5.60356100  | -2.55978700 | 1.04386400  |                                                          |
| H                     | 7.31995000  | 0.95151000  | -0.19994300 |                                                          |

|                          |             |             |             |                                                         |
|--------------------------|-------------|-------------|-------------|---------------------------------------------------------|
| H                        | -6.69576100 | -1.96192700 | 1.59013300  |                                                         |
| TS 5CQA 12OH anion W FHT |             |             |             |                                                         |
| Cartesian Coordinates    |             |             |             | Frequency and Energy                                    |
| C                        | -3.44338700 | -1.99949800 | -0.28176600 | Zero-point Energy Correction = 0.337551 Hartree         |
| C                        | -2.45623300 | -1.00908500 | -0.06424200 | Thermal Correction to Energy = 0.363438 Hartree         |
| C                        | -2.83449100 | 0.19835200  | 0.50652500  | Thermal Correction to Enthalpy = 0.364383 Hartree       |
| C                        | -4.16802200 | 0.42412400  | 0.86910600  | Thermal Correction to Free Energy = 0.279071 Hartree    |
| C                        | -5.14290100 | -0.58955000 | 0.63615300  |                                                         |
| C                        | -4.76625600 | -1.80038500 | 0.05937200  | EE + Zero-point Energy = -1447.6225 Hartree             |
| O                        | -4.56505800 | 1.55938700  | 1.43668300  | EE + Thermal Energy Correction = -1447.5966 Hartree     |
| O                        | -6.42307600 | -0.37537900 | 0.96313500  | EE + Thermal Enthalpy Correction = -1447.5957 Hartree   |
| C                        | -1.07871800 | -1.30983900 | -0.45651400 |                                                         |
| C                        | -0.02209100 | -0.49894500 | -0.32470800 | EE + Thermal Free Energy Correction = -1447.681 Hartree |
| C                        | 1.31075500  | -0.94649400 | -0.76355900 |                                                         |
| O                        | 1.56787900  | -2.02623000 | -1.25726500 |                                                         |
| H                        | -3.14540800 | -2.94053900 | -0.73115700 |                                                         |
| H                        | -2.12356100 | 0.99481900  | 0.69425000  |                                                         |
| H                        | -5.51713800 | -2.56173600 | -0.11200500 |                                                         |
| H                        | -5.01230500 | 2.19264000  | 0.65688200  |                                                         |
| H                        | -6.51201500 | 0.50117800  | 1.37136100  |                                                         |
| H                        | -0.92059500 | -2.29226000 | -0.89539700 |                                                         |
| H                        | -0.08325000 | 0.49606600  | 0.09832200  |                                                         |
| O                        | -5.46121600 | 2.63043100  | -0.48629700 |                                                         |
| O                        | -5.28237400 | 1.54812800  | -1.28416400 |                                                         |
| H                        | -4.39729300 | 1.65249000  | -1.67713600 |                                                         |
| O                        | 2.22987000  | 0.00431400  | -0.53786700 |                                                         |
| C                        | 3.60211600  | -0.25693100 | -0.89712000 |                                                         |
| C                        | 4.47504500  | 0.45356400  | 0.12271300  |                                                         |
| C                        | 3.86422800  | 0.28288900  | -2.29683300 |                                                         |
| H                        | 3.77027900  | -1.33495600 | -0.87175100 |                                                         |
| C                        | 5.95917700  | 0.23375300  | -0.19621200 |                                                         |
| H                        | 4.25292500  | 1.52375100  | 0.09900300  |                                                         |
| H                        | 4.25854000  | 0.07287800  | 1.12399000  |                                                         |
| C                        | 5.33170500  | 0.07021000  | -2.68171900 |                                                         |
| O                        | 2.98906700  | -0.28735300 | -3.26005600 |                                                         |
| H                        | 3.66072800  | 1.35810000  | -2.30070500 |                                                         |
| C                        | 6.26542200  | 0.66750700  | -1.63588900 |                                                         |
| O                        | 6.27832700  | -1.14272500 | -0.01655100 |                                                         |
| C                        | 6.81266500  | 1.07340300  | 0.79240300  |                                                         |
| O                        | 5.61316000  | -1.32072100 | -2.84055900 |                                                         |
| H                        | 5.50184800  | 0.57642300  | -3.63745000 |                                                         |
| H                        | 2.95392900  | -1.24294200 | -3.12090900 |                                                         |
| H                        | 6.16495600  | 1.75420200  | -1.68965300 |                                                         |
| H                        | 7.29976200  | 0.41348700  | -1.88242400 |                                                         |
| H                        | 6.91057600  | -1.14868200 | 0.72203700  |                                                         |
| O                        | 6.67934500  | 2.31627900  | 0.76418200  |                                                         |
| O                        | 7.57016000  | 0.42050500  | 1.55483500  |                                                         |
| H                        | 5.17023800  | -1.62468300 | -3.64119000 |                                                         |
| TS 5CQA 13OH anion W FHT |             |             |             |                                                         |

| Cartesian Coordinates  |             |             |             | Frequency and Energy                                     |
|------------------------|-------------|-------------|-------------|----------------------------------------------------------|
| C                      | 3.05450200  | 0.07478400  | -0.33730500 | Zero-point Energy Correction = 0.337554 Hartree          |
| C                      | 4.13923900  | 0.84203900  | 0.08698700  | Thermal Correction to Energy = 0.363494 Hartree          |
| C                      | 5.43764500  | 0.45711000  | -0.22270900 | Thermal Correction to Enthalpy = 0.364438 Hartree        |
| C                      | 5.66676900  | -0.73090900 | -0.96850000 | Thermal Correction to Free Energy = 0.279146 Hartree     |
| C                      | 4.56150300  | -1.50625700 | -1.37446500 | EE + Zero-point Energy = -1447.6214 Hartree              |
| C                      | 3.28087900  | -1.10937800 | -1.07766200 | EE + Thermal Energy Correction = -1447.5955 Hartree      |
| C                      | 1.71260700  | 0.53897700  | 0.01121700  | EE + Thermal Enthalpy Correction = -1447.5945 Hartree    |
| C                      | 0.56025900  | -0.03287000 | -0.35939700 | EE + Thermal Free Energy Correction = -1447.6798 Hartree |
| C                      | -0.72185100 | 0.55504700  | 0.07310200  |                                                          |
| O                      | -1.75615600 | -0.13733300 | -0.42240000 |                                                          |
| O                      | -0.84348900 | 1.53003600  | 0.78655700  |                                                          |
| C                      | -3.09496700 | 0.27818000  | -0.07745500 |                                                          |
| C                      | -3.95164300 | -0.97523700 | -0.03348500 |                                                          |
| C                      | -5.40203500 | -0.62300200 | 0.32430900  |                                                          |
| C                      | -5.95016800 | 0.43537200  | -0.64162000 |                                                          |
| C                      | -5.05285700 | 1.65548800  | -0.80898000 |                                                          |
| C                      | -3.61527000 | 1.24075900  | -1.13601200 |                                                          |
| O                      | -2.77362900 | 2.37490100  | -1.29102900 |                                                          |
| O                      | -5.45174000 | -0.14061000 | 1.66335600  |                                                          |
| O                      | 6.90421900  | -1.08032800 | -1.28980700 |                                                          |
| O                      | 6.53092800  | 1.14966800  | 0.14553600  |                                                          |
| O                      | -5.08832300 | 2.44831000  | 0.37779600  |                                                          |
| C                      | -6.26093300 | -1.91307600 | 0.23054900  |                                                          |
| O                      | -6.36950100 | -2.45974000 | -0.88871000 |                                                          |
| O                      | -6.77103500 | -2.31184300 | 1.30853900  |                                                          |
| H                      | 3.97717900  | 1.75069200  | 0.65817800  |                                                          |
| H                      | 4.75851600  | -2.41316700 | -1.93391300 |                                                          |
| H                      | 2.44520100  | -1.71446200 | -1.40594800 |                                                          |
| H                      | 1.66849100  | 1.43560500  | 0.62458800  |                                                          |
| H                      | 0.50384300  | -0.92078100 | -0.97652800 |                                                          |
| H                      | -3.06574900 | 0.76665200  | 0.89846900  |                                                          |
| H                      | -3.92611500 | -1.45791800 | -1.01421000 |                                                          |
| H                      | -3.55256000 | -1.67096700 | 0.70873100  |                                                          |
| H                      | -6.05903000 | -0.02839400 | -1.62497900 |                                                          |
| H                      | -6.94149700 | 0.75448500  | -0.30945300 |                                                          |
| H                      | -5.42406900 | 2.25506800  | -1.64657300 |                                                          |
| H                      | -3.61701100 | 0.72831600  | -2.10320500 |                                                          |
| H                      | -2.50341000 | 2.68359200  | -0.41622300 |                                                          |
| H                      | -5.95940700 | -0.81699500 | 2.14323500  |                                                          |
| H                      | 7.43936000  | -1.32674300 | -0.38026300 |                                                          |
| H                      | -4.68047200 | 3.29886800  | 0.17766300  |                                                          |
| O                      | 7.70049600  | -1.73975700 | 0.85886200  |                                                          |
| O                      | 6.49939000  | -1.56131600 | 1.46452300  |                                                          |
| H                      | 6.04420300  | -2.41987000 | 1.40448200  |                                                          |
| H                      | 6.27993700  | 1.93014700  | 0.65926300  |                                                          |
| TS 5CQA RAF C8 anion W |             |             |             |                                                          |
| Cartesian Coordinates  |             |             |             | Frequency and Energy                                     |
| C                      | -3.53091600 | -0.16615400 | -0.05188100 | Zero-point Energy Correction = 0.342051 Hartree          |

|                        |             |             |             |                                                          |
|------------------------|-------------|-------------|-------------|----------------------------------------------------------|
| C                      | -4.02946300 | 0.81884400  | -0.92956300 | Thermal Correction to Energy = 0.368028 Hartree          |
| C                      | -5.38292100 | 1.06276700  | -1.01851100 | Thermal Correction to Enthalpy = 0.368972 Hartree        |
| C                      | -6.27848800 | 0.33310700  | -0.22019600 | Thermal Correction to Free Energy = 0.283662 Hartree     |
| C                      | -5.79923400 | -0.63808700 | 0.65553000  |                                                          |
| C                      | -4.44201500 | -0.88953200 | 0.74147400  | EE + Zero-point Energy = -1447.618 Hartree               |
| C                      | -2.10964600 | -0.37116800 | -0.00202400 | EE + Thermal Energy Correction = -1447.592 Hartree       |
| C                      | -1.46436200 | -1.30110800 | 0.78671300  | EE + Thermal Enthalpy Correction = -1447.5911 Hartree    |
| C                      | -0.01101200 | -1.54924700 | 0.64079600  |                                                          |
| O                      | 0.64455500  | -0.49523700 | 0.15542100  | EE + Thermal Free Energy Correction = -1447.6764 Hartree |
| O                      | 0.51696500  | -2.59296700 | 0.96576700  |                                                          |
| C                      | 2.07761400  | -0.57713700 | -0.00372900 |                                                          |
| C                      | 2.63137300  | 0.81075800  | 0.26773200  |                                                          |
| C                      | 4.15549800  | 0.82548200  | 0.09488000  |                                                          |
| C                      | 4.54166400  | 0.29252900  | -1.29107300 |                                                          |
| C                      | 3.91123000  | -1.04945200 | -1.64480300 |                                                          |
| C                      | 2.39511600  | -1.01550800 | -1.42649600 |                                                          |
| O                      | 1.79239700  | -2.26134900 | -1.74696600 |                                                          |
| O                      | 4.75235400  | 0.03020900  | 1.11411000  |                                                          |
| O                      | -7.61292200 | 0.56304200  | -0.29041900 |                                                          |
| O                      | -5.95009100 | 1.99060300  | -1.84685300 |                                                          |
| O                      | 4.51072300  | -2.08456100 | -0.86448300 |                                                          |
| C                      | 4.65781800  | 2.28672800  | 0.24777700  |                                                          |
| O                      | 4.26472400  | 3.12727900  | -0.59060600 |                                                          |
| O                      | 5.42059500  | 2.50595000  | 1.22306300  |                                                          |
| H                      | -3.34478700 | 1.39156100  | -1.54764700 |                                                          |
| H                      | -6.51125000 | -1.18463700 | 1.26235300  |                                                          |
| H                      | -4.08797900 | -1.64488300 | 1.43200100  |                                                          |
| H                      | -1.50291900 | 0.30284700  | -0.59812500 |                                                          |
| H                      | 2.46640500  | -1.30297900 | 0.71269800  |                                                          |
| H                      | 2.18038800  | 1.51670400  | -0.43494400 |                                                          |
| H                      | 2.37581100  | 1.11831800  | 1.28492300  |                                                          |
| H                      | 4.20681500  | 1.01833900  | -2.03605300 |                                                          |
| H                      | 5.62976800  | 0.21502600  | -1.36244600 |                                                          |
| H                      | 4.09097200  | -1.25599800 | -2.70462500 |                                                          |
| H                      | 1.96614400  | -0.28540800 | -2.11966200 |                                                          |
| H                      | 1.96407500  | -2.88506000 | -1.02919800 |                                                          |
| H                      | 5.25623200  | 0.66572200  | 1.65044500  |                                                          |
| H                      | -7.79001800 | 1.26199400  | -0.93651500 |                                                          |
| H                      | 4.28169900  | -2.93216900 | -1.26256500 |                                                          |
| H                      | -2.00005400 | -2.13063900 | 1.23135600  |                                                          |
| O                      | -1.26053900 | -0.47422100 | 2.57488100  |                                                          |
| H                      | -5.27062500 | 2.43820500  | -2.36783000 |                                                          |
| O                      | -0.85053800 | 0.83037100  | 2.47526200  |                                                          |
| H                      | -1.67000300 | 1.34317900  | 2.39265700  |                                                          |
| TS 5FQA RAF C8 anion W |             |             |             |                                                          |
| Cartesian Coordinates  |             |             |             | Frequency and Energy                                     |
| C                      | -3.27647900 | -0.32277800 | -0.08427800 | Zero-point Energy Correction = 0.370855 Hartree          |
| C                      | -3.83593400 | 0.96756600  | -0.23960600 | Thermal Correction to Energy = 0.398049 Hartree          |
| C                      | -5.20376200 | 1.14140700  | -0.23519800 | Thermal Correction to Enthalpy = 0.398993 Hartree        |



|                       |             |             |             |                                                     |
|-----------------------|-------------|-------------|-------------|-----------------------------------------------------|
| C                     | -6.05052600 | 0.02629900  | -0.06956900 | Thermal Correction to Free Energy = 0.310996        |
| C                     | -5.51235200 | -1.24509100 | 0.08608100  | Hartree                                             |
| C                     | -4.13936800 | -1.42289000 | 0.07960200  | EE + Zero-point Energy = -1486.877 Hartree          |
| C                     | -1.84639600 | -0.44448500 | -0.09165100 | EE + Thermal Energy Correction = -1486.8498 Hartree |
| C                     | -1.15573200 | -1.62525000 | 0.08539000  | EE + Thermal Enthalpy Correction = -1486.8489       |
| C                     | 0.30700100  | -1.70730900 | -0.16342400 | Hartree                                             |
| O                     | 0.92891600  | -0.54132700 | 0.00557500  | EE + Thermal Free Energy Correction = -1486.9369    |
| O                     | 0.86010400  | -2.74550300 | -0.45561700 | Hartree                                             |
| C                     | 2.34498000  | -0.46157900 | -0.26332700 |                                                     |
| C                     | 2.95370700  | 0.47878500  | 0.76325600  |                                                     |
| C                     | 4.44916700  | 0.65138500  | 0.48649100  |                                                     |
| C                     | 4.66935400  | 1.17427800  | -0.94063300 |                                                     |
| C                     | 4.02193200  | 0.27048500  | -1.98566100 |                                                     |
| C                     | 2.53482800  | 0.06606600  | -1.68110400 |                                                     |
| O                     | 1.93041200  | -0.79090100 | -2.63555800 |                                                     |
| O                     | 5.08585800  | -0.62251500 | 0.62559500  |                                                     |
| O                     | -7.39550400 | 0.18876900  | -0.06090000 |                                                     |
| O                     | -5.85791400 | 2.32564400  | -0.37717700 |                                                     |
| O                     | 4.67667800  | -0.99577000 | -2.09311400 |                                                     |
| C                     | 5.08022200  | 1.63909700  | 1.49663700  |                                                     |
| O                     | 4.57512400  | 2.77962600  | 1.57956700  |                                                     |
| O                     | 6.06921900  | 1.20659800  | 2.14077300  |                                                     |
| H                     | -3.17207500 | 1.81427600  | -0.36269200 |                                                     |
| H                     | -6.18815200 | -2.08256400 | 0.21127200  |                                                     |
| H                     | -3.74065700 | -2.42201400 | 0.20250200  |                                                     |
| H                     | -1.27709900 | 0.47476100  | -0.18595600 |                                                     |
| H                     | 2.77240900  | -1.46200400 | -0.17372400 |                                                     |
| H                     | 2.46132400  | 1.45252600  | 0.69984500  |                                                     |
| H                     | 2.80673200  | 0.07537800  | 1.76808300  |                                                     |
| H                     | 4.22982400  | 2.17140100  | -1.02266800 |                                                     |
| H                     | 5.74156500  | 1.25605300  | -1.13945700 |                                                     |
| H                     | 4.09904400  | 0.73273900  | -2.97215300 |                                                     |
| H                     | 2.02474600  | 1.03044900  | -1.76392400 |                                                     |
| H                     | 2.45370500  | -1.60361900 | -2.66534200 |                                                     |
| H                     | 5.83199000  | -0.46273400 | 1.22896600  |                                                     |
| H                     | -7.60418900 | 1.12670800  | -0.18426100 |                                                     |
| H                     | 4.97075400  | -1.24860500 | -1.20466500 |                                                     |
| H                     | -1.65270700 | -2.58126800 | -0.02049700 |                                                     |
| O                     | -0.94789000 | -1.83186400 | 2.02673800  |                                                     |
| O                     | -2.20739500 | -1.85158900 | 2.57417500  |                                                     |
| H                     | -2.54415400 | -2.74506200 | 2.39934900  |                                                     |
| C                     | -5.06072700 | 3.49818700  | -0.53273000 |                                                     |
| H                     | -4.42236800 | 3.64507200  | 0.34152300  |                                                     |
| H                     | -4.44976400 | 3.42931200  | -1.43577200 |                                                     |
| H                     | -5.76128000 | 4.32480300  | -0.62254100 |                                                     |
| TS 5FQA 13OH FHT P    |             |             |             |                                                     |
| Cartesian Coordinates |             |             |             | Frequency and Energy                                |
| C                     | 3.09105500  | 0.05135700  | -0.34752100 | Zero-point Energy Correction = 0.381077 Hartree     |
| C                     | 4.18018000  | 0.82955600  | 0.06390100  | Thermal Correction to Energy = 0.408055 Hartree     |

|                       |             |             |             |                                                     |
|-----------------------|-------------|-------------|-------------|-----------------------------------------------------|
| C                     | 5.47952700  | 0.39901300  | -0.16326800 | Thermal Correction to Enthalpy = 0.408999 Hartree   |
| C                     | 5.71526400  | -0.83755600 | -0.84219900 | Thermal Correction to Free Energy = 0.320789        |
| C                     | 4.60015800  | -1.61598400 | -1.22595400 | Hartree                                             |
| C                     | 3.31864900  | -1.18055100 | -0.99622600 | EE + Zero-point Energy = -1487.3047 Hartree         |
| C                     | 1.75168900  | 0.56482900  | -0.07950900 | EE + Thermal Energy Correction = -1487.2777 Hartree |
| C                     | 0.59171900  | -0.04438400 | -0.36068600 | EE + Thermal Enthalpy Correction = -1487.2767       |
| C                     | -0.67517200 | 0.62972700  | -0.02878400 | Hartree                                             |
| O                     | -1.72966500 | -0.09649100 | -0.41201200 | EE + Thermal Free Energy Correction = -1487.3649    |
| O                     | -0.77267100 | 1.71103800  | 0.51553400  | Hartree                                             |
| C                     | -3.05802300 | 0.30332400  | 0.00426400  |                                                     |
| C                     | -3.86532700 | -0.98767600 | -0.01034400 |                                                     |
| C                     | -5.33675400 | -0.72920500 | 0.32072700  |                                                     |
| C                     | -5.93118800 | 0.27788000  | -0.67226300 |                                                     |
| C                     | -5.13324700 | 1.57029300  | -0.68217300 |                                                     |
| C                     | -3.64027400 | 1.34748800  | -0.94838900 |                                                     |
| O                     | -3.03738100 | 2.62431400  | -0.81325300 |                                                     |
| O                     | -5.48264600 | -0.29159700 | 1.66780100  |                                                     |
| O                     | 6.92451600  | -1.21443600 | -1.15669000 |                                                     |
| O                     | 6.58753600  | 1.06260900  | 0.22373500  |                                                     |
| O                     | -5.29863900 | 2.19431200  | 0.59267500  |                                                     |
| C                     | -6.11184900 | -2.04903800 | 0.19638100  |                                                     |
| O                     | -6.81896600 | -2.39118500 | 1.26892400  |                                                     |
| O                     | -6.09510000 | -2.71872700 | -0.79979000 |                                                     |
| H                     | 3.99067300  | 1.77319100  | 0.55978800  |                                                     |
| H                     | 4.79765000  | -2.55498900 | -1.72923400 |                                                     |
| H                     | 2.48228600  | -1.78821800 | -1.31896100 |                                                     |
| H                     | 1.70201000  | 1.54132500  | 0.39698800  |                                                     |
| H                     | 0.51945200  | -1.01887600 | -0.82676000 |                                                     |
| H                     | -2.99044800 | 0.71418600  | 1.01606000  |                                                     |
| H                     | -3.80009600 | -1.44250600 | -1.00193500 |                                                     |
| H                     | -3.44031100 | -1.68524100 | 0.71488300  |                                                     |
| H                     | -5.91224900 | -0.16536700 | -1.67043400 |                                                     |
| H                     | -6.97203900 | 0.49133300  | -0.41376800 |                                                     |
| H                     | -5.51559300 | 2.23607700  | -1.46262800 |                                                     |
| H                     | -3.51907400 | 0.97747300  | -1.97468000 |                                                     |
| H                     | -2.19755200 | 2.53735600  | -0.33962900 |                                                     |
| H                     | -5.46911000 | 0.67868900  | 1.67668700  |                                                     |
| H                     | 7.58857100  | -1.29149700 | -0.25262800 |                                                     |
| H                     | -4.67332100 | 2.93081800  | 0.62772600  |                                                     |
| O                     | 8.07687900  | -1.54309300 | 0.86817800  |                                                     |
| O                     | 7.07105400  | -1.26616600 | 1.74087900  |                                                     |
| H                     | 7.01024800  | -0.29469500 | 1.72964400  |                                                     |
| C                     | 6.42976500  | 2.37168000  | 0.77517500  |                                                     |
| H                     | 5.92022300  | 3.02599900  | 0.06425900  |                                                     |
| H                     | 5.87575500  | 2.33377000  | 1.71684300  |                                                     |
| H                     | 7.43766900  | 2.73784000  | 0.95614300  |                                                     |
| H                     | -6.67111500 | -1.70579100 | 1.94500000  |                                                     |
| TS 5FQA 13OH FHT P    |             |             |             |                                                     |
| Cartesian Coordinates |             |             |             | Frequency and Energy                                |

|   |             |             |             |                                                     |
|---|-------------|-------------|-------------|-----------------------------------------------------|
| C | 3.07828200  | 0.11251800  | -0.31392500 | Zero-point Energy Correction = 0.365891 Hartree     |
| C | 4.16262600  | 0.86547700  | 0.14481700  | Thermal Correction to Energy = 0.393284 Hartree     |
| C | 5.46243300  | 0.48398000  | -0.17155700 | Thermal Correction to Enthalpy = 0.394228 Hartree   |
| C | 5.68686700  | -0.68957100 | -0.94997100 | Thermal Correction to Free Energy = 0.305769        |
| C | 4.58300900  | -1.44276500 | -1.38993500 | Hartree                                             |
| C | 3.30211100  | -1.04582800 | -1.09080900 | EE + Zero-point Energy = -1486.8769 Hartree         |
| C | 1.73579500  | 0.56370900  | 0.04995100  | EE + Thermal Energy Correction = -1486.8496 Hartree |
| C | 0.58440700  | 0.00093000  | -0.33749000 | EE + Thermal Enthalpy Correction = -1486.8486       |
| C | -0.70009500 | 0.56082200  | 0.12345400  | Hartree                                             |
| O | -1.72941900 | -0.12573100 | -0.39035700 | EE + Thermal Free Energy Correction = -1486.9371    |
| O | -0.82807400 | 1.50738100  | 0.87316100  | Hartree                                             |
| C | -3.07136500 | 0.25203700  | -0.01602600 |                                                     |
| C | -3.90292400 | -1.01912100 | -0.00882900 |                                                     |
| C | -5.35652500 | -0.70858800 | 0.37148900  |                                                     |
| C | -5.93314200 | 0.36955600  | -0.55513300 |                                                     |
| C | -5.06415200 | 1.61471200  | -0.68214000 |                                                     |
| C | -3.62024400 | 1.24321500  | -1.03314700 |                                                     |
| O | -2.80309400 | 2.39948900  | -1.14991200 |                                                     |
| O | -5.40418200 | -0.27137800 | 1.72585700  |                                                     |
| O | 6.92323500  | -1.04250500 | -1.26748400 |                                                     |
| O | 6.57397600  | 1.12634200  | 0.21809700  |                                                     |
| O | -5.10896100 | 2.36264100  | 0.53338900  |                                                     |
| C | -6.19335200 | -2.01023400 | 0.24204300  |                                                     |
| O | -6.29005900 | -2.53012800 | -0.89103100 |                                                     |
| O | -6.70095000 | -2.44352100 | 1.30780500  |                                                     |
| H | 3.97612600  | 1.74951100  | 0.74134800  |                                                     |
| H | 4.77923500  | -2.33415300 | -1.97389100 |                                                     |
| H | 2.46607900  | -1.63622600 | -1.44387400 |                                                     |
| H | 1.69003600  | 1.43811200  | 0.69462000  |                                                     |
| H | 0.52978100  | -0.86478600 | -0.98542200 |                                                     |
| H | -3.04053300 | 0.70466500  | 0.97707800  |                                                     |
| H | -3.87639800 | -1.46691500 | -1.00585900 |                                                     |
| H | -3.48394300 | -1.73165800 | 0.70596000  |                                                     |
| H | -6.03518100 | -0.06183100 | -1.55382900 |                                                     |
| H | -6.93015500 | 0.65397700  | -0.20872200 |                                                     |
| H | -5.45407000 | 2.23653900  | -1.49457900 |                                                     |
| H | -3.61818400 | 0.76828800  | -2.01938900 |                                                     |
| H | -2.53516600 | 2.68160500  | -0.26551900 |                                                     |
| H | -5.90607400 | -0.96662500 | 2.18447900  |                                                     |
| H | 7.46632600  | -1.26915500 | -0.36133400 |                                                     |
| H | -4.72108900 | 3.22889900  | 0.36226400  |                                                     |
| O | 7.77441900  | -1.66125000 | 0.88017200  |                                                     |
| O | 6.57530300  | -1.60675500 | 1.51312800  |                                                     |
| H | 6.54299300  | -0.72948000 | 1.93653300  |                                                     |
| C | 6.42495700  | 2.23936900  | 1.10395100  |                                                     |
| H | 5.87012200  | 3.04285100  | 0.61591100  |                                                     |
| H | 5.91560400  | 1.92847000  | 2.01890000  |                                                     |
| H | 7.43480600  | 2.56992900  | 1.33227200  |                                                     |
